# Supplementary material for: Thermoelectric properties of (Ba,K)Cd2As2 crystallized in the CaAl2Si2-type structure
Source: Royal Society of Chemistry journal article supplement (doi:10.1039/c8dt02955e), 2018-01-01
Supplement: c8dt02955e1.pdf [file c8dt02955e1.pdf]

## Thermoelectric properties of (Ba,K)Cd<sub>2</sub>As<sub>2</sub> crystallized in the CaAl<sub>2</sub>Si<sub>2</sub>-type structure

H. Kunioka,<sup>1</sup> K. Kihou,<sup>1</sup> H. Nishiate,<sup>1</sup> H. Usui,<sup>2</sup> K. Kuroki,<sup>2</sup> and C. H. Lee<sup>1</sup>

*<sup>1</sup>National Institute of Advanced Industrial Science and  
Technology (AIST), Tsukuba, Ibaraki 305-8568, Japan*

*<sup>2</sup>Department of Physics, Osaka University, Toyonaka, Osaka 560-0043, Japan*

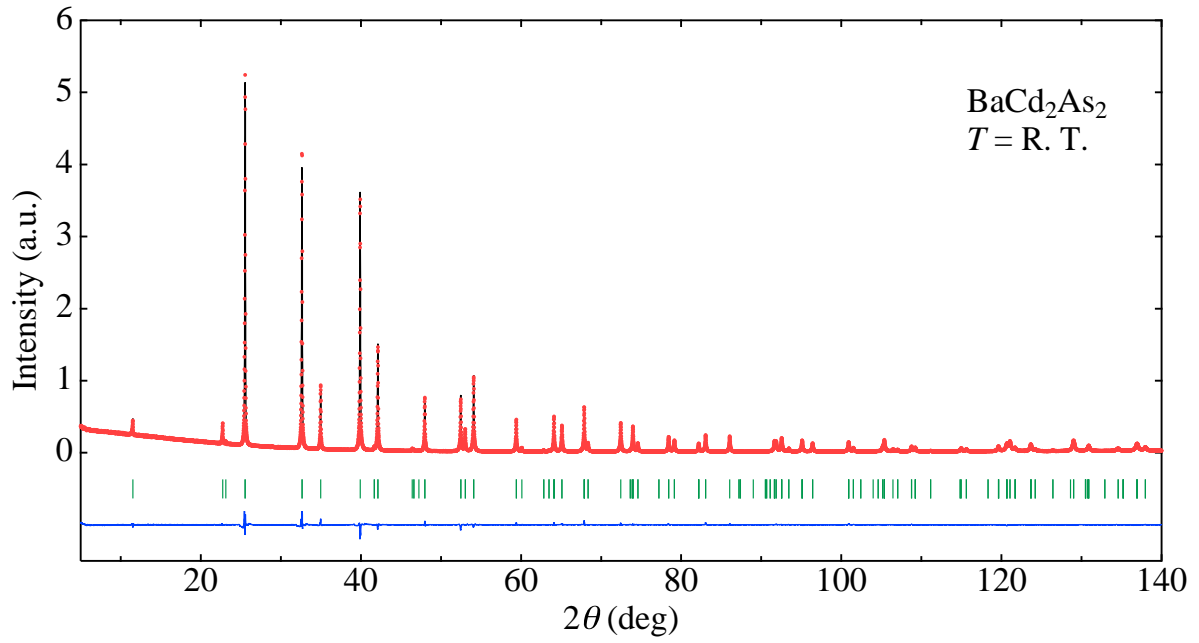

FIG. S1. Observed (red dots) and calculated (solid black line) x-ray powder diffraction patterns for BaCd<sub>2</sub>As<sub>2</sub> at room temperature. Vertical bars show the calculated positions of the diffraction peaks for BaCd<sub>2</sub>As<sub>2</sub>. The solid line at the bottom indicates the difference between observations and calculations.

| Atom                                                                            | Site | $g$  | $x$ | $y$ | $z$        | $B$ ( $\text{\AA}^2$ ) |
|---------------------------------------------------------------------------------|------|------|-----|-----|------------|------------------------|
| <b>BaCd<sub>2</sub>As<sub>2</sub></b>                                           |      |      |     |     |            |                        |
| $a = 4.5142(5) \text{ \AA}, c = 7.6905(7) \text{ \AA}, R_{\text{wp}} = 5.46 \%$ |      |      |     |     |            |                        |
| Ba                                                                              | 1a   | 1    | 0   | 0   | 0          | 0.21(2)                |
| Cd                                                                              | 2d   | 1    | 1/3 | 2/3 | 0.62892(6) | 0.59(2)                |
| As                                                                              | 2d   | 1    | 1/3 | 2/3 | 0.2632(1)  | 0.34(2)                |
| <b>Ba<sub>0.99</sub>K<sub>0.01</sub>Cd<sub>2</sub>As<sub>2</sub></b>            |      |      |     |     |            |                        |
| $a = 4.5146(4) \text{ \AA}, c = 7.6930(5) \text{ \AA}, R_{\text{wp}} = 5.22 \%$ |      |      |     |     |            |                        |
| Ba                                                                              | 1a   | 0.99 | 0   | 0   | 0          | 0.10(2)                |
| K                                                                               | 1a   | 0.01 | 0   | 0   | 0          | $B_{\text{Ba}}$        |
| Cd                                                                              | 2d   | 1    | 1/3 | 2/3 | 0.62885(6) | 0.40(2)                |
| As                                                                              | 2d   | 1    | 1/3 | 2/3 | 0.26271(9) | 0.18(2)                |
| <b>Ba<sub>0.98</sub>K<sub>0.02</sub>Cd<sub>2</sub>As<sub>2</sub></b>            |      |      |     |     |            |                        |
| $a = 4.5151(4) \text{ \AA}, c = 7.6980(5) \text{ \AA}, R_{\text{wp}} = 5.40 \%$ |      |      |     |     |            |                        |
| Ba                                                                              | 1a   | 0.98 | 0   | 0   | 0          | 0.16(2)                |
| K                                                                               | 1a   | 0.02 | 0   | 0   | 0          | $B_{\text{Ba}}$        |
| Cd                                                                              | 2d   | 1    | 1/3 | 2/3 | 0.62895(6) | 0.44(2)                |
| As                                                                              | 2d   | 1    | 1/3 | 2/3 | 0.26266(9) | 0.23(2)                |
| <b>Ba<sub>0.97</sub>K<sub>0.03</sub>Cd<sub>2</sub>As<sub>2</sub></b>            |      |      |     |     |            |                        |
| $a = 4.5143(4) \text{ \AA}, c = 7.7021(5) \text{ \AA}, R_{\text{wp}} = 5.45 \%$ |      |      |     |     |            |                        |
| Ba                                                                              | 1a   | 0.97 | 0   | 0   | 0          | 0.25(2)                |
| K                                                                               | 1a   | 0.03 | 0   | 0   | 0          | $B_{\text{Ba}}$        |
| Cd                                                                              | 2d   | 1    | 1/3 | 2/3 | 0.62910(6) | 0.57(2)                |
| As                                                                              | 2d   | 1    | 1/3 | 2/3 | 0.26270(9) | 0.36(2)                |
| <b>Ba<sub>0.96</sub>K<sub>0.04</sub>Cd<sub>2</sub>As<sub>2</sub></b>            |      |      |     |     |            |                        |
| $a = 4.5138(4) \text{ \AA}, c = 7.7061(5) \text{ \AA}, R_{\text{wp}} = 5.77 \%$ |      |      |     |     |            |                        |
| Ba                                                                              | 1a   | 0.96 | 0   | 0   | 0          | 0.38(2)                |
| K                                                                               | 1a   | 0.04 | 0   | 0   | 0          | $B_{\text{Ba}}$        |
| Cd                                                                              | 2d   | 1    | 1/3 | 2/3 | 0.62890(6) | 0.72(2)                |
| As                                                                              | 2d   | 1    | 1/3 | 2/3 | 0.2626(1)  | 0.45(2)                |
| <b>Ba<sub>0.92</sub>K<sub>0.08</sub>Cd<sub>2</sub>As<sub>2</sub></b>            |      |      |     |     |            |                        |
| $a = 4.5119(4) \text{ \AA}, c = 7.7129(5) \text{ \AA}, R_{\text{wp}} = 6.56 \%$ |      |      |     |     |            |                        |
| Ba                                                                              | 1a   | 0.92 | 0   | 0   | 0          | 0.35(2)                |
| K                                                                               | 1a   | 0.08 | 0   | 0   | 0          | $B_{\text{Ba}}$        |
| Cd                                                                              | 2d   | 1    | 1/3 | 2/3 | 0.62966(7) | 0.80(2)                |
| As                                                                              | 2d   | 1    | 1/3 | 2/3 | 0.2637(1)  | 0.62(2)                |

FIG. S2. Atomic parameters for Ba<sub>1-x</sub>K<sub>x</sub>Cd<sub>2</sub>As<sub>2</sub> (space group  $P\bar{3}m1$ ) determined by Rietveld refinements. The quantities  $g$  and  $B$  are the site occupancy and the isotropic atomic displacement parameters. The isotropic atomic displacement parameters of K atoms are constrained to be those of Ba atoms ( $B_{\text{Ba}}$ ).

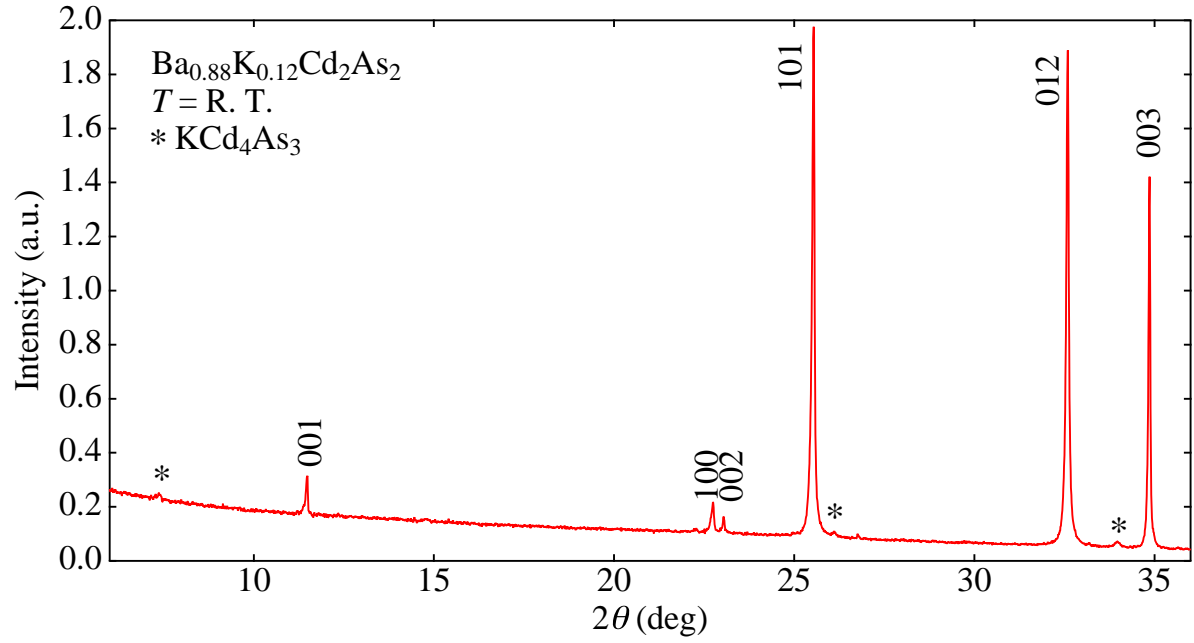

FIG. S3. X-ray diffraction pattern for  $\text{Ba}_{0.88}\text{K}_{0.12}\text{Cd}_2\text{As}_2$  at room temperature.  $\text{KCd}_4\text{As}_3$  appears as an impurity phase.

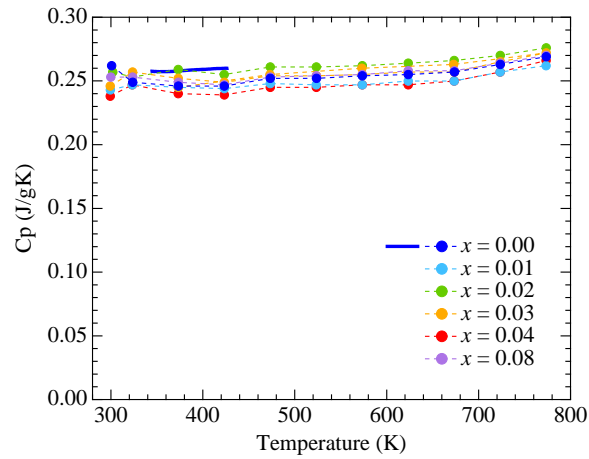

FIG. S4. Temperature dependence of the specific heat for  $\text{Ba}_{1-x}\text{K}_x\text{Cd}_2\text{As}_2$  measured by the laser-flash method (circles) and the differential scanning calorimetry (solid line).
